# Supplementary material
Source: publisher site journal article supplement (https://www.degruyterbrill.com/publication/isbn/9783110323429/downloadAsset/9783110323429_Inhaltsverzeichnis.pdf)
Supplement: Supplementary file 1 [file 9783110323429_Inhaltsverzeichnis.pdf]

# Inhalt

|          |                                                                                                               |
|----------|---------------------------------------------------------------------------------------------------------------|
| <b>1</b> | <b>Einleitung: Untersuchungen zu Berlin, SBB-PK, Ms. germ. fol. 863 — 1</b>                                   |
| 1.1      | Die heutige Berliner Handschrift Ms. germ. fol. 863 als Forschungsgegenstand — 4                              |
| 1.2      | Die Handschrift Berlin, SBB-PK, Ms. germ. fol. 863 als materielles Objekt — 9                                 |
| 1.2.1    | Äußere Beschreibung — 11                                                                                      |
| 1.2.2    | Provenienzen — 17                                                                                             |
| 1.2.3    | Paläografische Untersuchung — 21                                                                              |
| 1.3      | Terminologische und methodische Vorbemerkungen — 28                                                           |
| 1.3.1    | Der Exempelbegriff — 28                                                                                       |
| 1.3.2    | Text- und Überlieferungsgeschichte deutscher Prosaexempla — 35                                                |
| 1.3.3    | Das Studium von Sammelhandschriften — 41                                                                      |
| <br>     |                                                                                                               |
| <b>2</b> | <b>Berlin, SBB-PK, Ms. germ. fol. 863 im Überlieferungszusammenhang — 51</b>                                  |
| 2.1      | Die Straßburger Überlieferung der ›Alemannischen Vitaspatrum‹ — 52                                            |
| 2.1.1    | ›Vitaspatrum‹-Textzeugen aus dem Umfeld von Ms. germ. fol. 863 — 54                                           |
| 2.1.2    | Die Beziehungen der Straßburger ›Vitaspatrum‹-Textzeugen — 63                                                 |
| 2.2      | Caesarius' ›Dialogus miraculorum‹: Zum lateinischen Überlieferungshintergrund von Ms. germ. fol. 863 — 77     |
| 2.2.1    | ›Dialogus‹-Exempla in Ms. germ. fol. 863 — 77                                                                 |
| 2.2.2    | Lateinische Exzerpthandschriften des ›Dialogus miraculorum‹ — 80                                              |
| 2.2.3    | Die ›Dialogus‹-Übersetzungen in Ms. germ. fol. 863 — 87                                                       |
| 2.3      | Überlieferungsgeschichtliche Verortung von Ms. germ. fol. 863 im Straßburger Kontext und darüber hinaus — 100 |
| <br>     |                                                                                                               |
| <b>3</b> | <b>Deutsche Exempelsammlungen: Entwicklungen, Formen, Funktionen — 123</b>                                    |
| 3.1      | Skizze einer Literaturgeschichte der deutschen Prosaexempelsammlung — 125                                     |
| 3.1.1    | Forschungsüberblick zum deutschen Prosaexempel und der Prosaexempelsammlung — 127                             |
| 3.1.2    | Die Entwicklung der deutschen Prosaexempelsammlung — 131                                                      |
| 3.1.2.1  | Die Anfänge im späten 13. Jahrhundert — 131                                                                   |
| 3.1.2.2  | Die Entwicklung im 14. Jahrhundert — 136                                                                      |
| 3.1.2.3  | Die reiche Überlieferung des 15. Jahrhunderts und ihre Besonderheiten — 145                                   |
| 3.1.2.4  | Fazit zur Entwicklung vom 13. bis zum 15. Jahrhundert — 149                                                   |

- 3.2 Ms. germ. fol. 863 als Kontext und im Kontext — **151**
- 3.2.1 Ms. germ. fol. 863 als Kontext: Die Handschrift und ihre verschiedenen Sammlungen — **151**
- 3.2.1.1 Die Exempelsammlungen in der mittleren kodikologischen Einheit B — **152**
- 3.2.1.2 Die Sammlung der ›*bredigen merlin*‹ in der kodikologischen Einheit C und das Phänomen der gedoppelten Texte in Ms. germ. fol. 863 — **159**
- 3.2.2 Ms. germ. fol. 863 im Kontext: Exempelsammlungen vom Typ der ›*bredigen merlin*‹ – Bestandsaufnahme und Deutungsversuch — **177**
- 3.2.2.1 Umfangreiche mittelhochdeutsche Exempelhandschriften — **178**
- 3.2.2.2 Provenienzen und Funktionen der vorgestellten Handschriften — **194**

#### **4 Fallstudien zur Überlieferung deutscher Prosaexempla — 209**

- 4.1 Marienmirakel — **210**
- 4.1.1 ›Maria und der zisterziensische Arzt‹ (B149/C31) — **211**
- 4.1.2 ›Die Küsterin Beatrix‹ (C9) — **216**
- 4.2 Mystische Exempla — **223**
- 4.2.1 ›Vier Tugenden einer Klosterfrau‹ (B140) — **225**
- 4.2.2 ›St. Bernhard und die fünf Brüder‹ (B351) — **232**
- 4.3 Fazit: Tendenzen der Überlieferung deutscher Prosaexempla — **246**

#### **5 Schlussbetrachtungen: Exempla im Kontext — 251**

#### **6 Repertorium — 263**

- 6.1 Vorbemerkungen — **263**
- 6.2 Transkriptionsregeln — **266**
- 6.3 Verzeichnis der Texte in Ms. germ. fol. 863 — **267**

#### **Literaturverzeichnis — 439**

- Siglenverzeichnis — **439**
- Abkürzungsverzeichnis — **440**
- Handschriften- und Frühdruckkataloge — **440**
- Wörterbücher, Datenbanken und Repertorien — **444**
- Forschungsliteratur und moderne Textausgaben — **446**

#### **Abbildungsverzeichnis — 465**

#### **Register — 466**

- Register der Namen, Personen, Werke und Orte — **466**
- Handschriftenverzeichnis — **482**
- Verzeichnis der Drucke bis 1600 — **487**
- Konkordanz TUBACH – Ms. germ. fol. 863 — **488**
